# Supplementary material for: Divergent branches of mitochondrial signaling regulate specific genes and the viability of specialized cell types of differentiated yeast colonies
Source: PubMed Central journal article supplement (PMC4941242; doi:10.18632/oncotarget.8084), 2016-03-15
Supplement: oncotarget-07-15299-s001.pdf [file oncotarget-07-15299-s001.pdf]

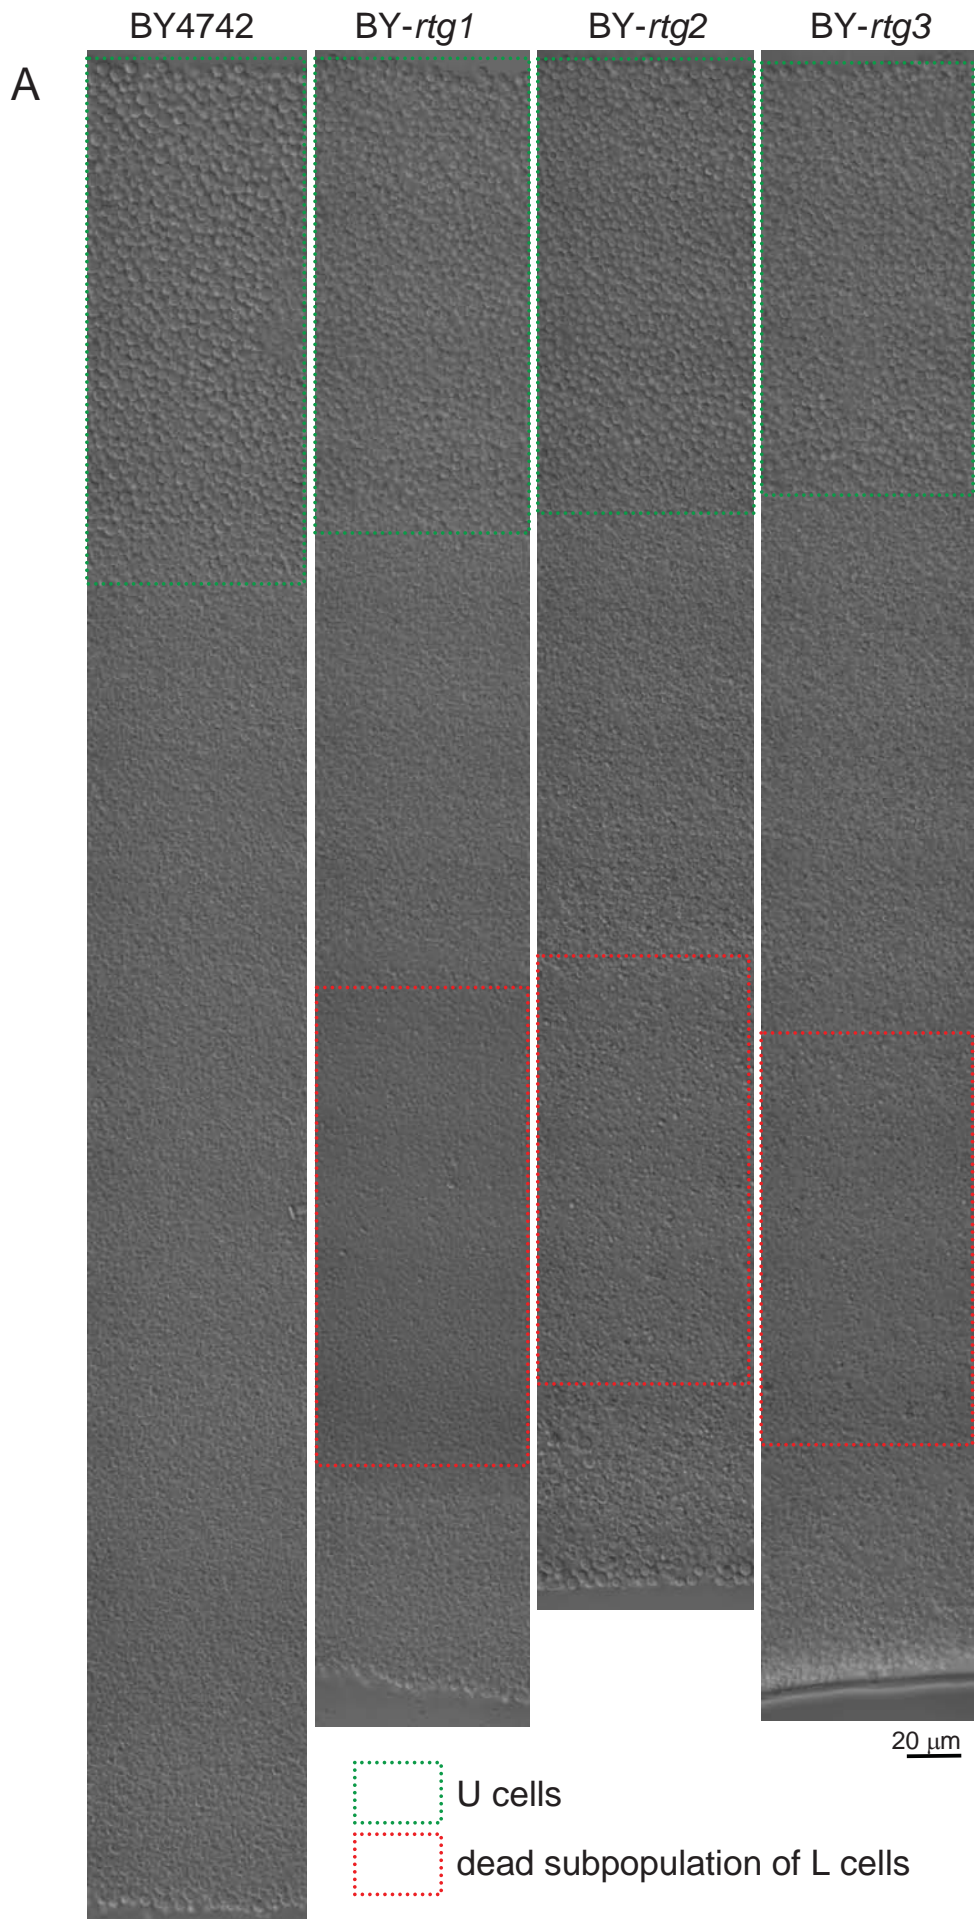

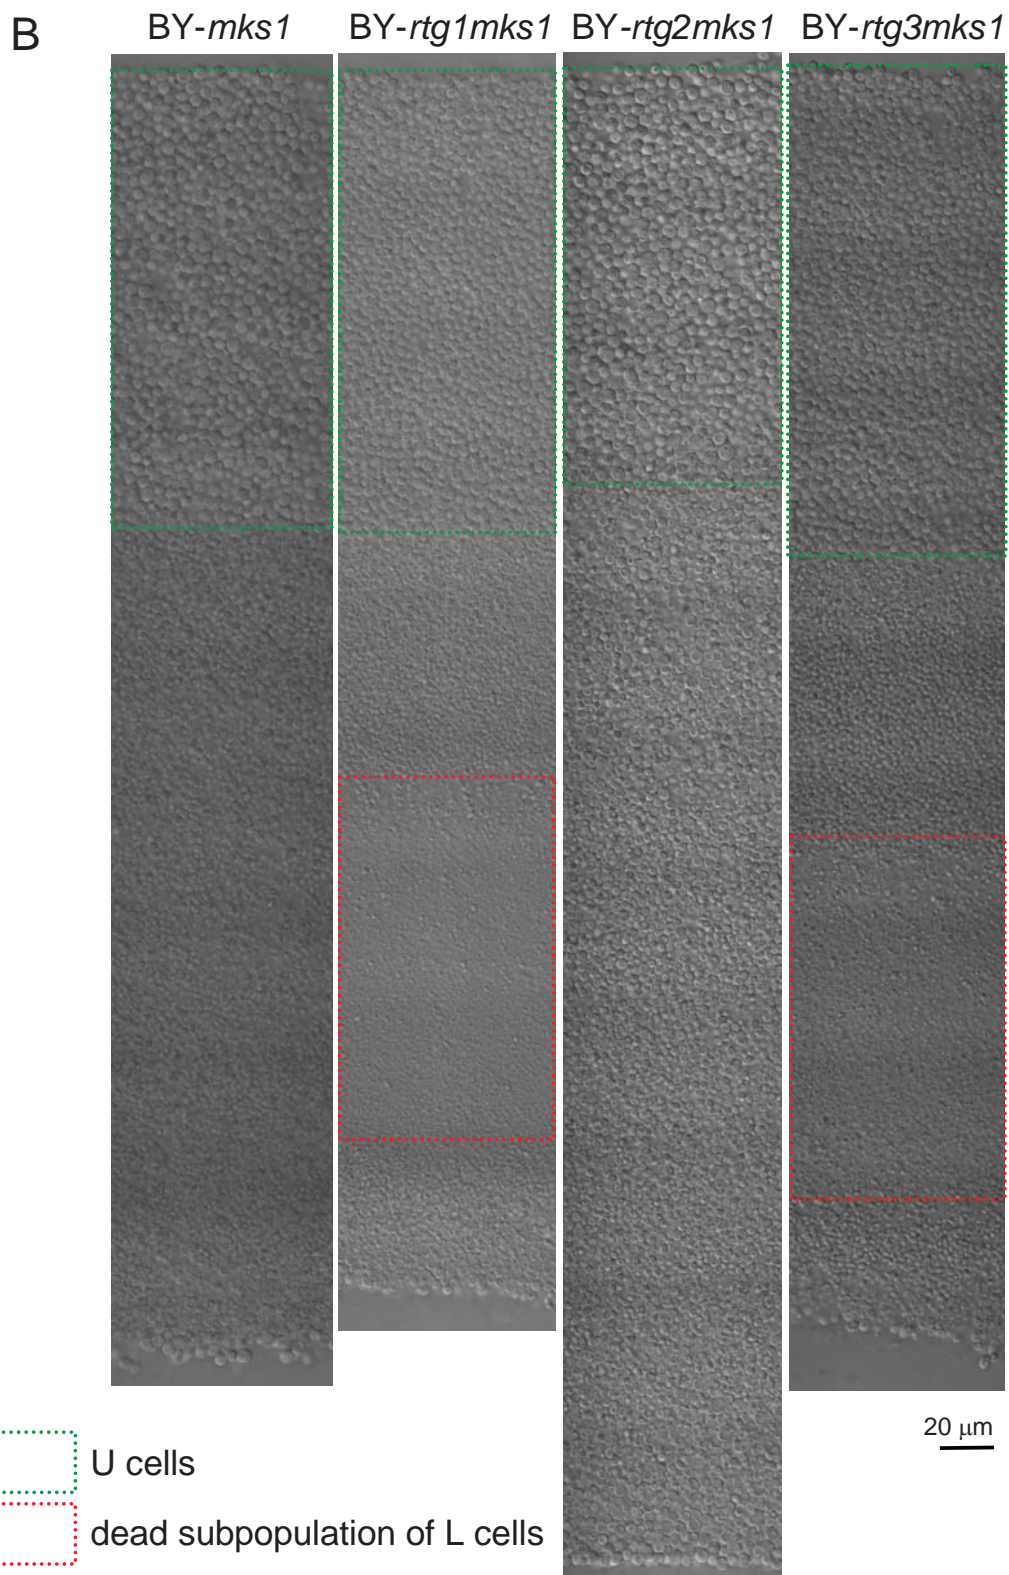

**Figure S1**

**Vertical transversal cross-sections of 17-day-old colonies formed by wt and KO strains.** (A, B) Cross-sections (20  $\mu$ m thin) of colonies formed by wt and different *rtg* $\Delta$  strains were prepared by vibrating microtome and visualized by Nomarski contrast. The green dotted rectangle delimitates U cells, and the red dotted rectangle delimitates lower L cells with decreased viability in colonies of *rtg* $\Delta$  strains.
