# Supplementary material for: Divergent branches of mitochondrial signaling regulate specific genes and the viability of specialized cell types of differentiated yeast colonies
Source: PubMed Central journal article supplement (PMC4941242; doi:10.18632/oncotarget.8084), 2016-03-15
Supplement: oncotarget-07-15299-s003.pdf [file oncotarget-07-15299-s003.pdf]

A

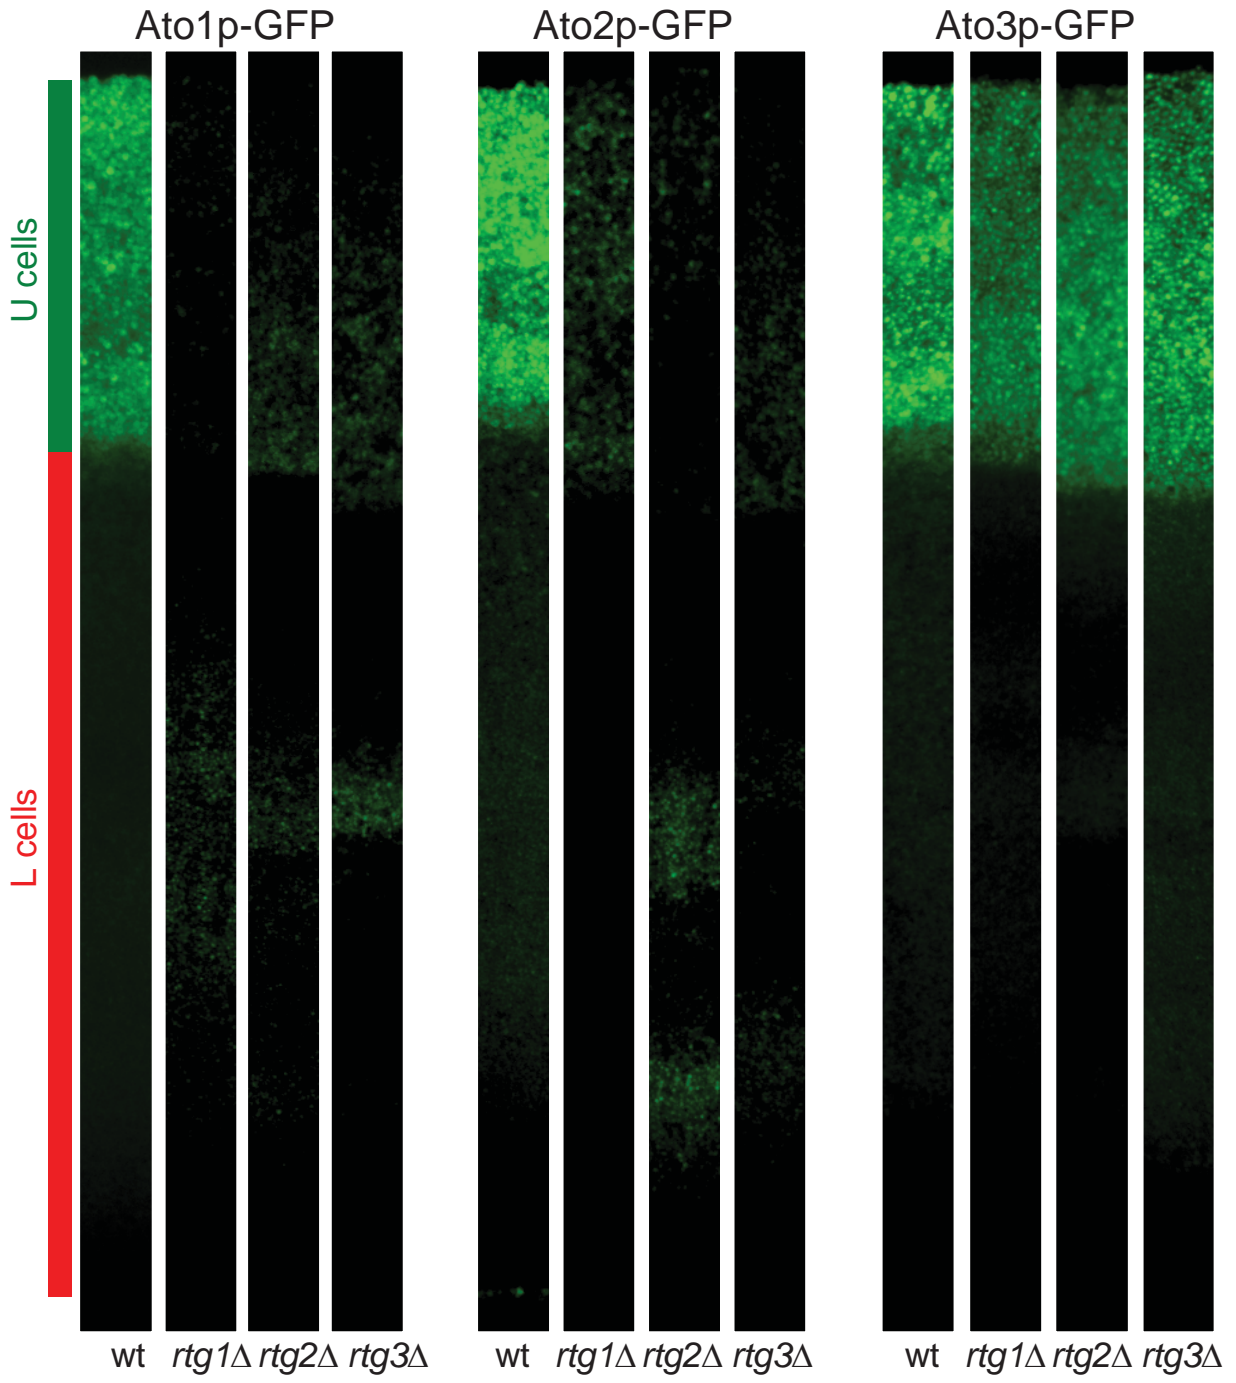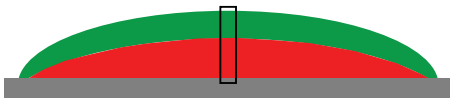

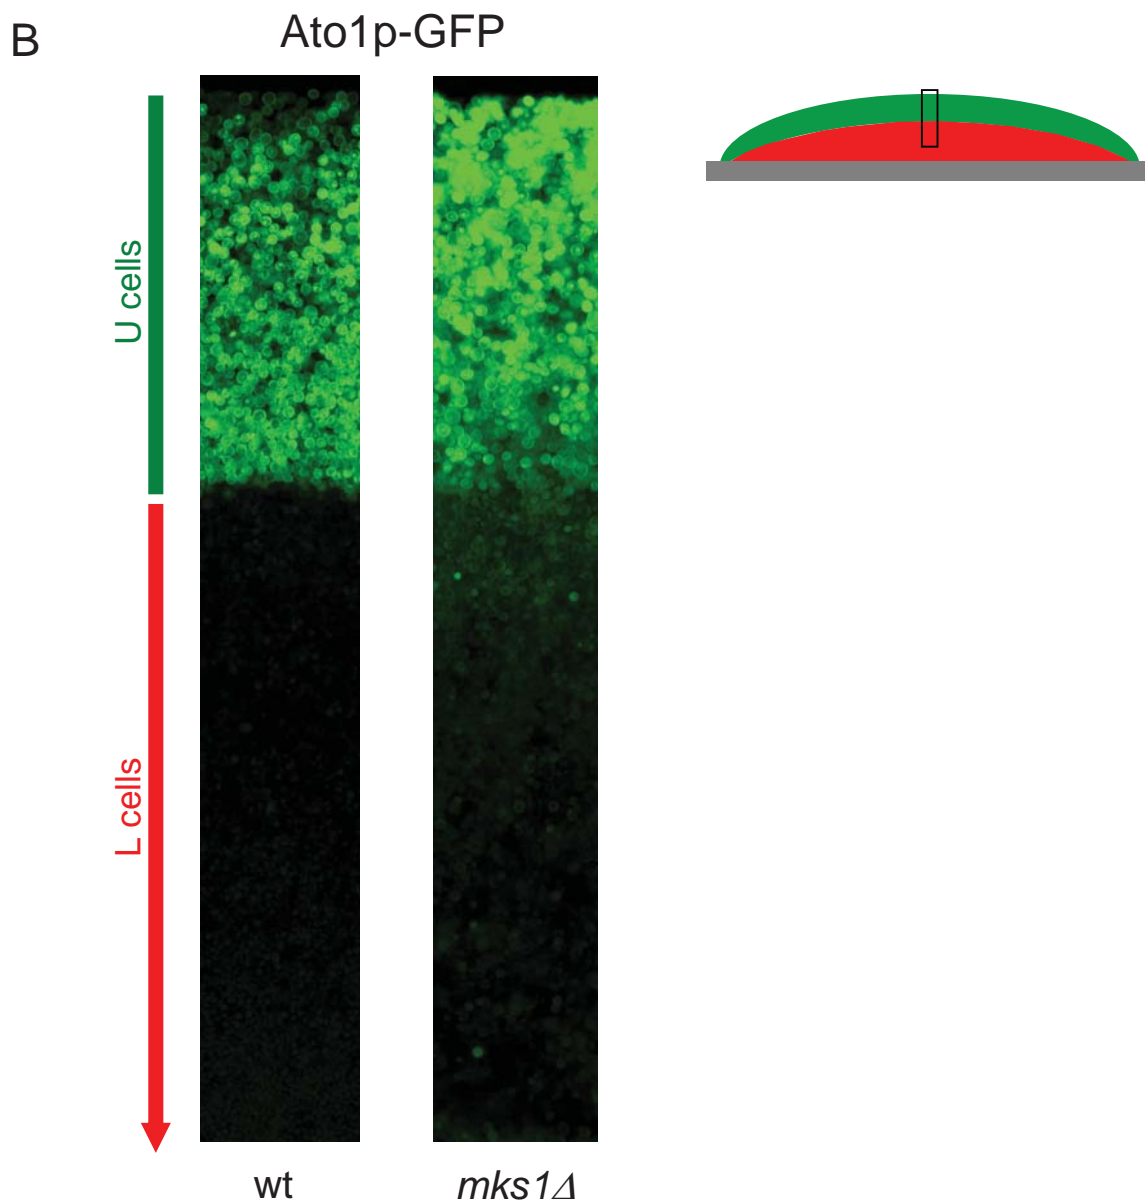

**Figure S3**

**Vertical transversal cross-sections of 14-day-old colonies formed by wt and KO strains producing Ato-GFP proteins.** Cross-sections (20  $\mu\text{m}$  thin) of colonies formed by wt, *rtgΔ* and *mks1Δ* strains were prepared by vibrating microtome, and Ato-GFP fluorescence was detected by wide-field fluorescence microscopy. (A) Differences in Ato-GFP production in wt and *rtgΔ* colonies. Green and red bars indicate U and L cells, respectively. Approximate position of the shown segment of cross-sections is depicted below using a schematic view of a colony cross-section. (B) Differences in Ato1p-GFP production in wt and *mks1Δ* strains: U cells and upper part of L cells, showing that upper L cells in colonies of *mks1Δ* strain produce and properly localize Ato1p-GFP to the membrane. The same microscopy setup was used for wt and *mks1Δ* colonies. Approximate position of the shown segment of cross-sections is depicted on the right side using a schematic view of a colony cross-section.
