# Supplementary material for: Divergent branches of mitochondrial signaling regulate specific genes and the viability of specialized cell types of differentiated yeast colonies
Source: PubMed Central journal article supplement (PMC4941242; doi:10.18632/oncotarget.8084), 2016-03-15
Supplement: oncotarget-07-15299-s004.pdf [file oncotarget-07-15299-s004.pdf]

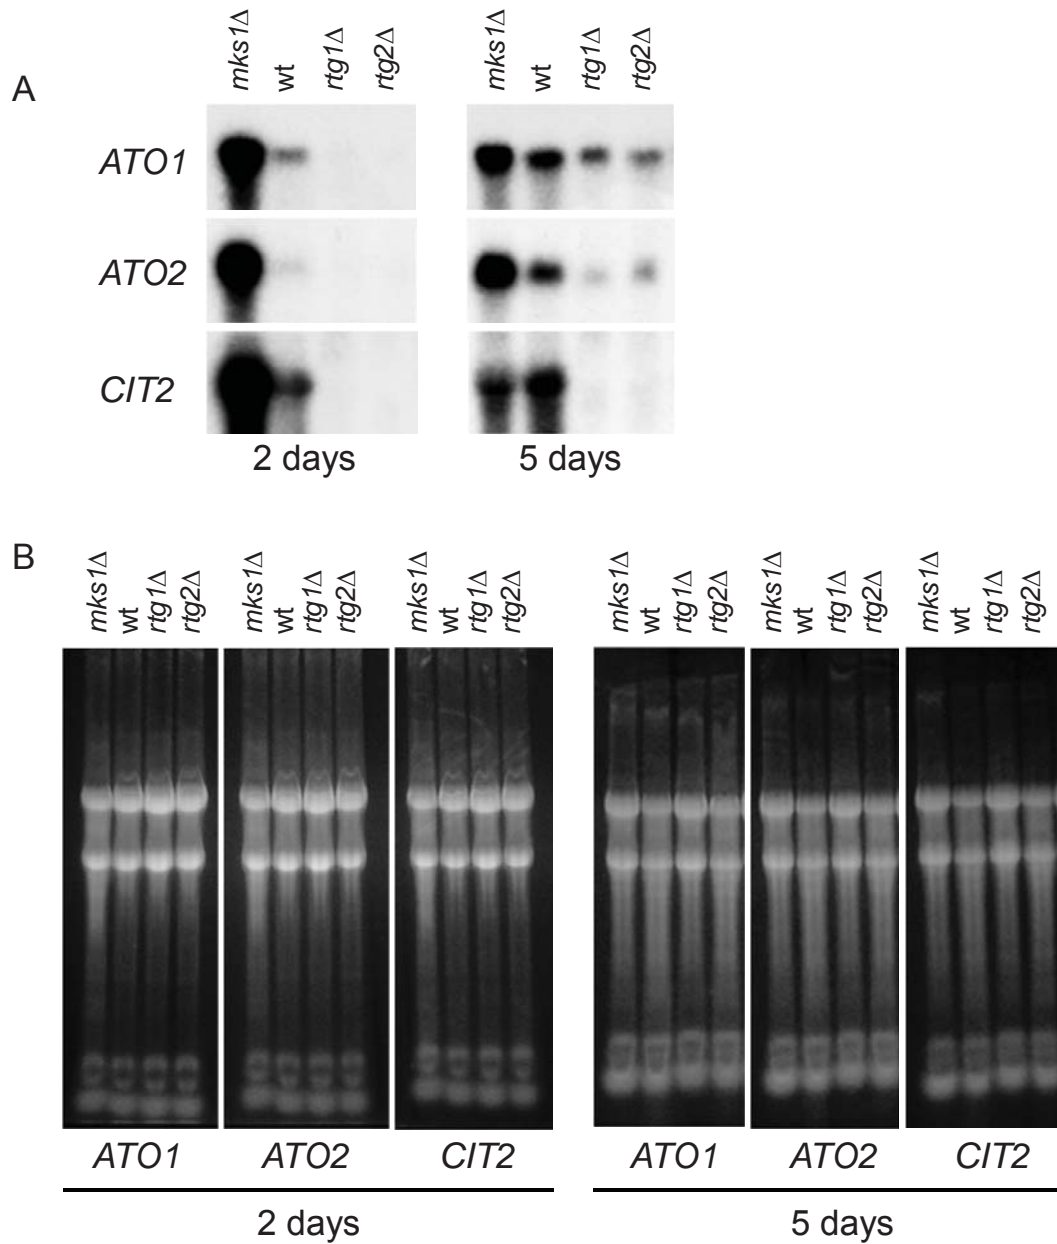

**Figure S4:**  
***ATO1*, *ATO2* and *CIT2* mRNA levels in 2- and 5-day-old microcolonies of wt and KO strains.** A, Northern blots. B, rRNAs visualized by ethidium bromid staining (loading controls).
