# Supplementary material for: Divergent branches of mitochondrial signaling regulate specific genes and the viability of specialized cell types of differentiated yeast colonies
Source: PubMed Central journal article supplement (PMC4941242; doi:10.18632/oncotarget.8084), 2016-03-15
Supplement: oncotarget-07-15299-s005.pdf [file oncotarget-07-15299-s005.pdf]

Loading controls for the Figure 3A

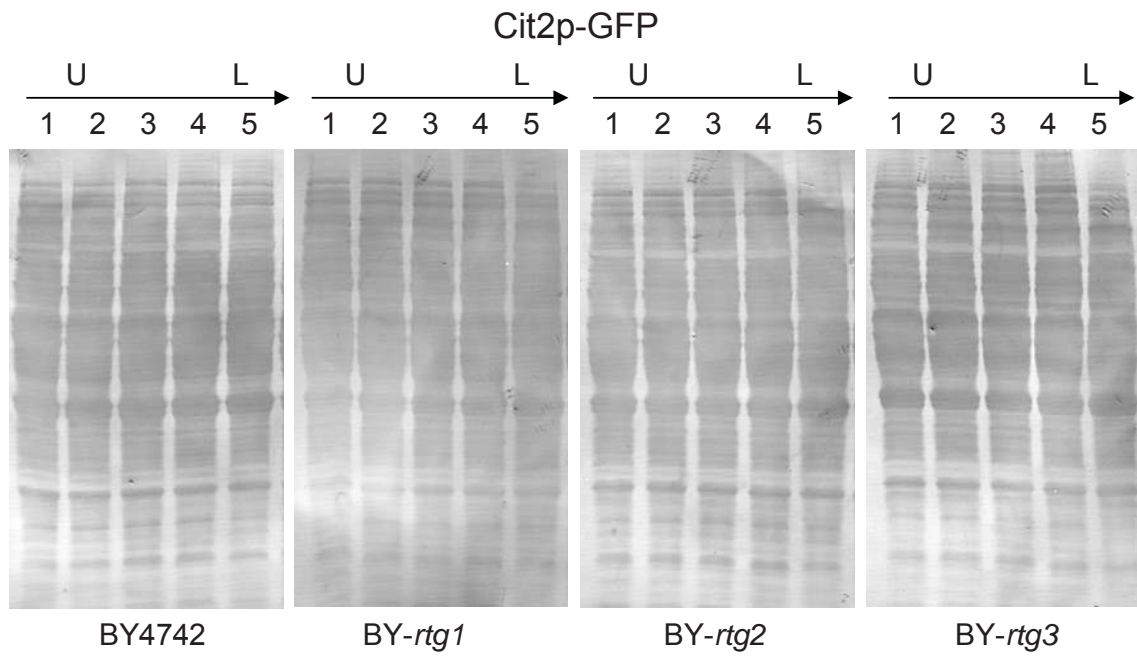

Loading controls for the Figure 3B

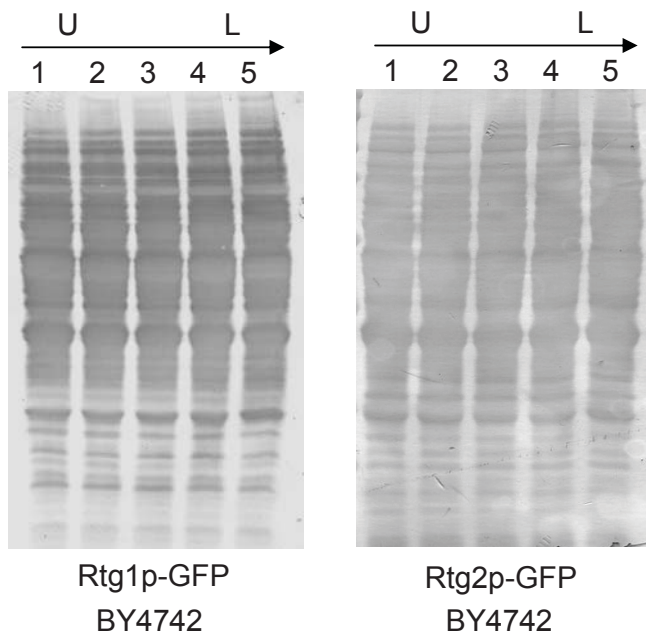

Loading controls for the Figure 4

A

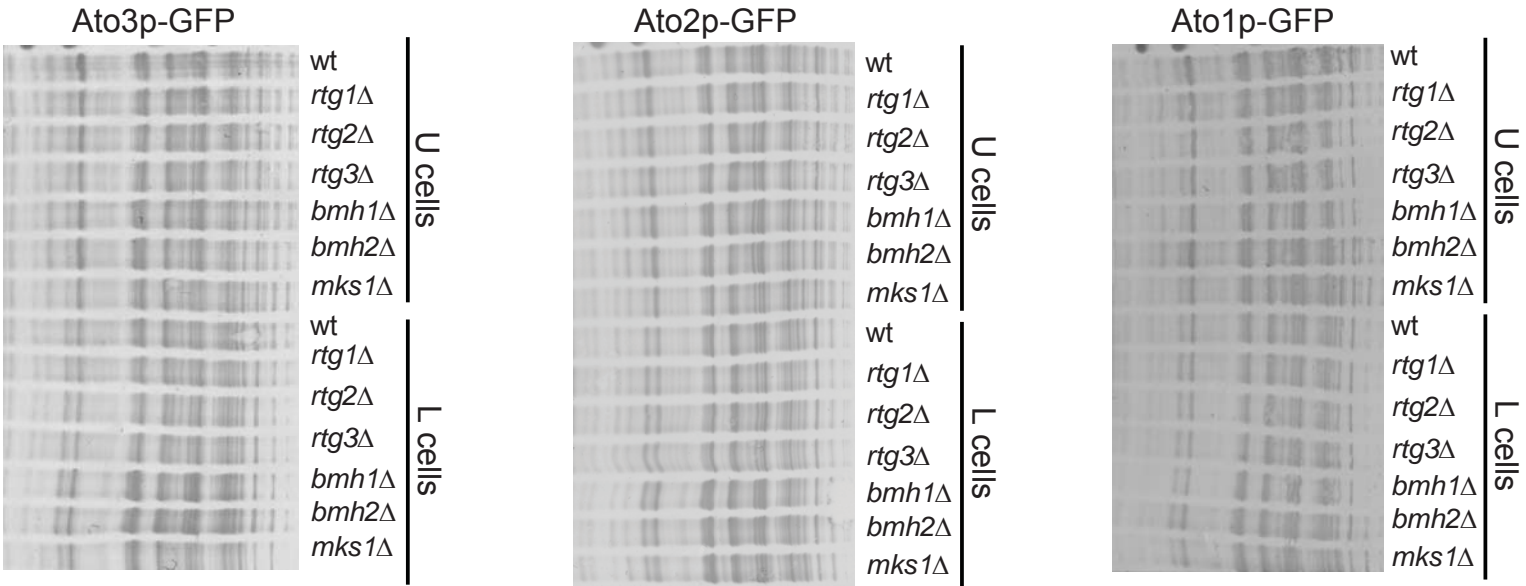

B

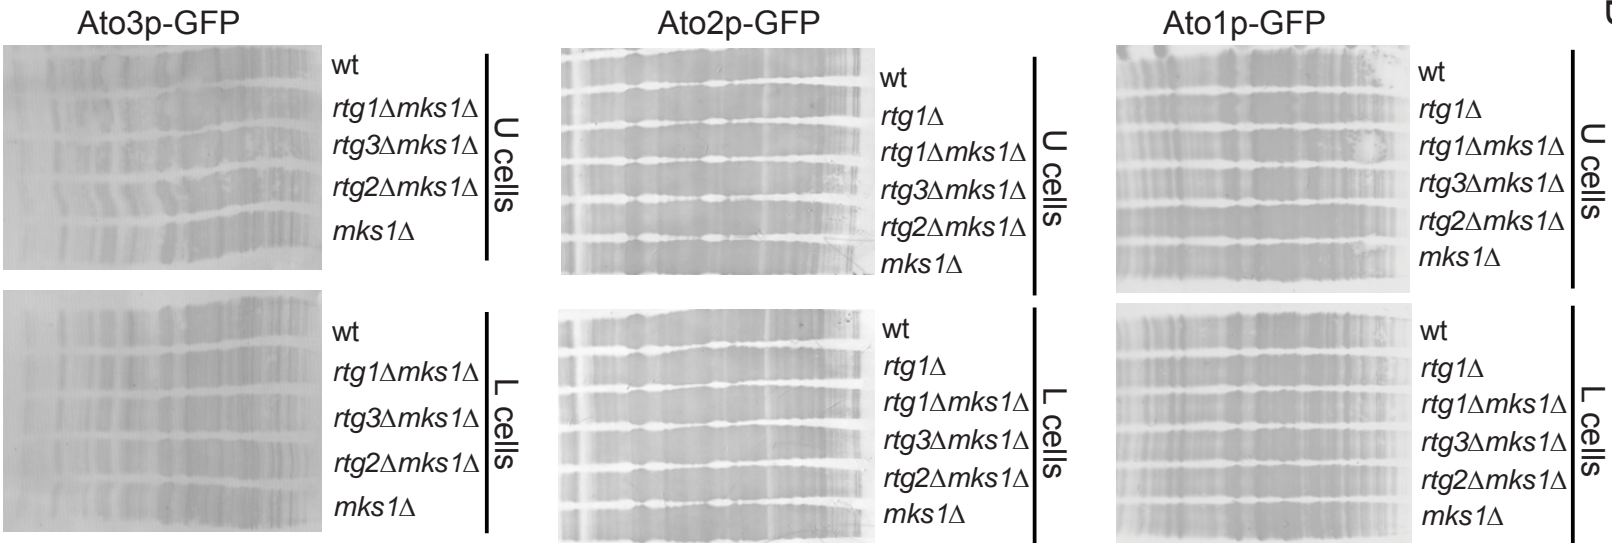

Loading controls for the Figure 5A

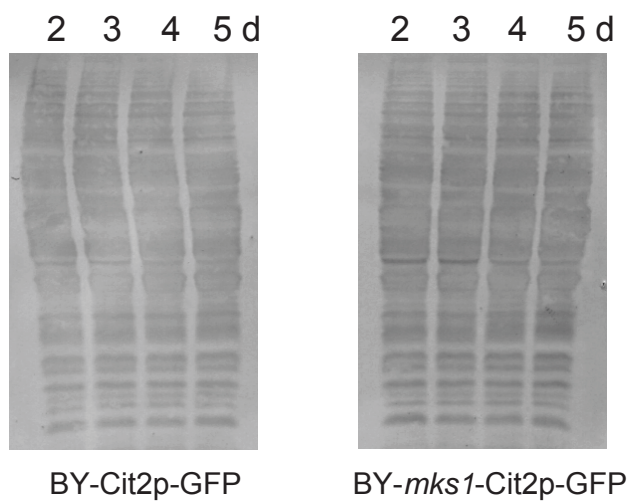

Loading controls for the Figure 5C

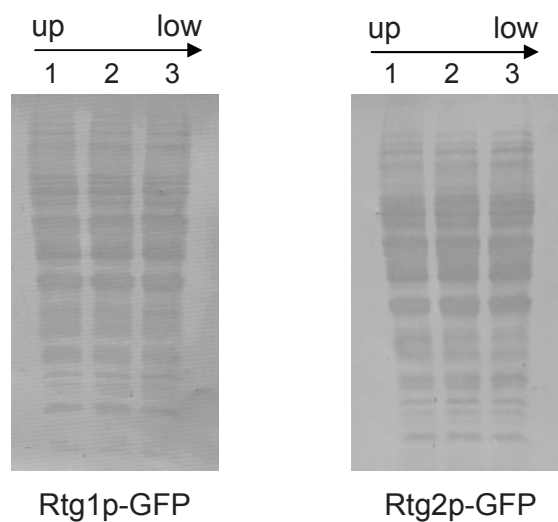

**Figure S5**

**Loading controls for Western blots shown in Figures 3, 4 and 5.**  
Membranes stained by the Coomassie blue dye.
